# Supplementary material
Source: PubMed Central journal article supplement (PMC6036921)

## Supplementary materials

### Supplementary Table 1

Incidence of treatment-emergent AEs, all causalities (treatment related).

| Number of subjects evaluable for AEs by system organ class and MedDRA preferred term | Treatment phase<br>(N=32) | Post-treatment phase<br>(N=29) | Overall<br>(N=32) |
|--------------------------------------------------------------------------------------|---------------------------|--------------------------------|-------------------|
| Gastrointestinal disorders                                                           | 4 (3)                     | 2 (1)                          | 4 (3)             |
| Breath odor                                                                          | 1 (0)                     | 1 (0)                          | 1 (0)             |
| Constipation                                                                         | 1 (1)                     | 0 (0)                          | 1 (1)             |
| Diarrhea                                                                             | 1 (1)                     | 1 (1)                          | 1 (1)             |
| Nausea                                                                               | 1 (1)                     | 0 (0)                          | 1 (1)             |
| Rectal hemorrhage                                                                    | 1 (1)                     | 0 (0)                          | 1 (1)             |
| General disorders and administration site conditions                                 | 4 (4)                     | 2 (1)                          | 5 (4)             |
| Fatigue                                                                              | 4 (4)                     | 1 (1)                          | 4 (4)             |
| Pain                                                                                 | 0 (0)                     | 1 (0)                          | 1 (0)             |
| Infections and infestations                                                          | 3 (3)                     | 2 (1)                          | 4 (3)             |
| Herpes simplex                                                                       | 1 (1)                     | 0 (0)                          | 1 (1)             |

| Number of subjects evaluable for AEs by system organ class and MedDRA preferred term | Treatment phase<br>(N=32) | Post-treatment phase<br>(N=29) | Overall<br>(N=32) |
|--------------------------------------------------------------------------------------|---------------------------|--------------------------------|-------------------|
| Oral herpes                                                                          | 1 (1)                     | 1 (1)                          | 1 (1)             |
| Upper respiratory tract infection                                                    | 1 (1)                     | 1 (0)                          | 2 (1)             |
| Musculoskeletal and connective tissue disorders                                      | 1 (1)                     | 2 (1)                          | 3 (2)             |
| Arthralgia                                                                           | 0 (0)                     | 1 (0)                          | 1 (0)             |
| Myalgia                                                                              | 1 (1)                     | 1 (1)                          | 2 (2)             |
| Neoplasm benign, malignant and unspecified (incl. cysts and polyps)                  | 0 (0)                     | 1 (0)                          | 1 (0)             |
| Squamous cell carcinoma of the skin                                                  | 0 (0)                     | 1 (0)                          | 1 (0)             |
| Nervous system disorders                                                             | 5 (3)                     | 0 (0)                          | 5 (3)             |
| Headache                                                                             | 4 (2)                     | 0 (0)                          | 4 (2)             |
| Tremor                                                                               | 1 (1)                     | 0 (0)                          | 1 (1)             |
| Psychiatric disorders                                                                | 1 (1)                     | 1 (1)                          | 1 (1)             |
| Depression                                                                           | 1 (1)                     | 1 (1)                          | 1 (1)             |
| Respiratory, thoracic and mediastinal disorders                                      | 3 (2)                     | 2 (2)                          | 3 (2)             |
| Oropharyngeal pain                                                                   | 2 (1)                     | 1 (1)                          | 2 (1)             |
| Rhinorrhea                                                                           | 1 (1)                     | 1 (1)                          | 1 (1)             |
| Skin and subcutaneous tissue disorders                                               | 1 (1)                     | 0 (0)                          | 1 (1)             |
| Rash                                                                                 | 1 (1)                     | 0 (0)                          | 1 (1)             |

| Number of subjects evaluable for AEs by system organ class and MedDRA preferred term | Treatment phase<br>(N=32) | Post-treatment phase<br>(N=29) | Overall<br>(N=32) |
|--------------------------------------------------------------------------------------|---------------------------|--------------------------------|-------------------|
| Vascular disorders                                                                   | 1 (1)                     | 0 (0)                          | 1 (1)             |
| Hot flush                                                                            | 1 (1)                     | 0 (0)                          | 1 (1)             |
| Total preferred term events                                                          | 24 (20)                   | 13 (8)                         | 29 (21)           |

AE, adverse event; MedDRA, Medical Dictionary for Regulatory Activities (Version 18.1).



**Supplementary Fig. 2.** T-cell counts during and following treatment with tofacitinib. Note that box plots provide medians and 25%/75% quartiles, with whiskers to the last point within  $1.5 \times$  interquartile range; baseline is defined as the average (mean of non-missing) of the three pre-dose measurements; the connecting lines are for geometric means; the dots represent the geometric means; and the circles represent individual values. Study Day 43 is Day 14 post-treatment; Study Day 57 is Day 28 post-treatment. CD, cluster of differentiation; CM, central memory; E, effector; EM, effector memory.

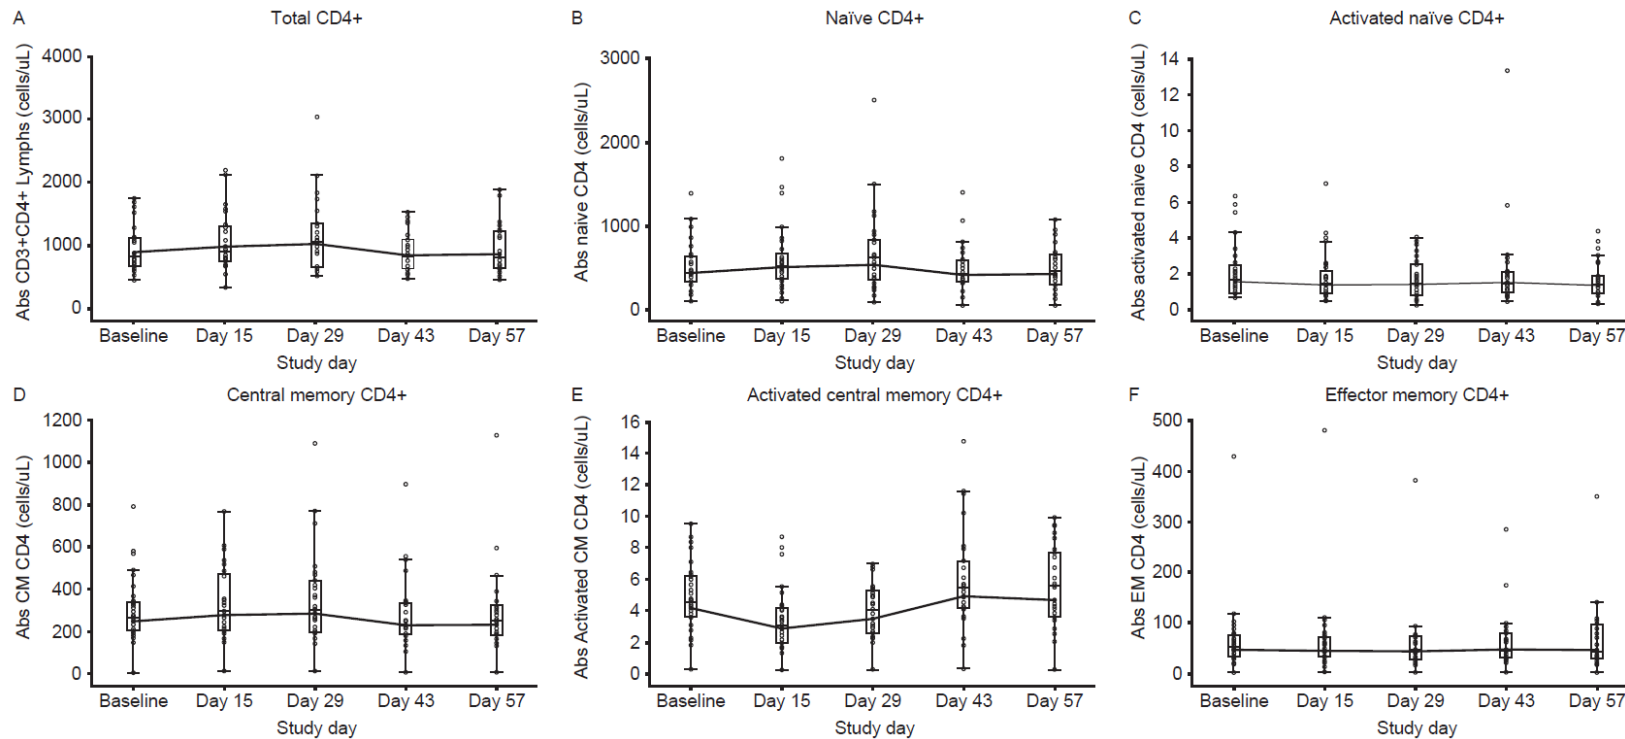

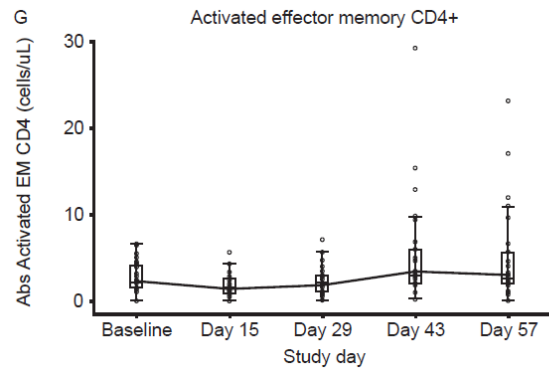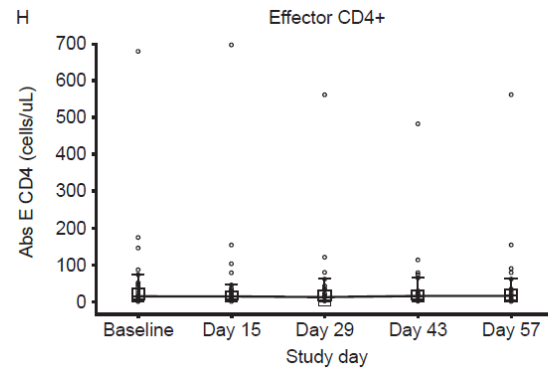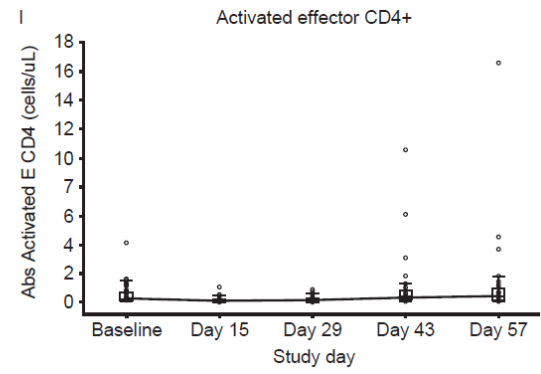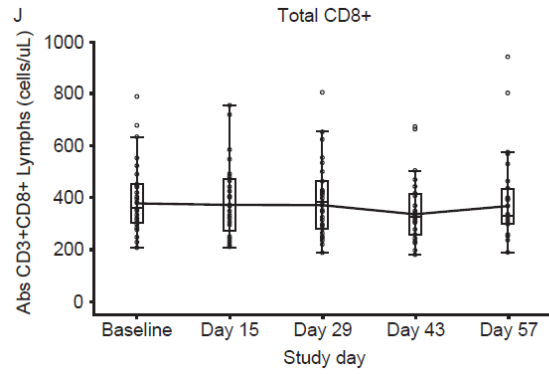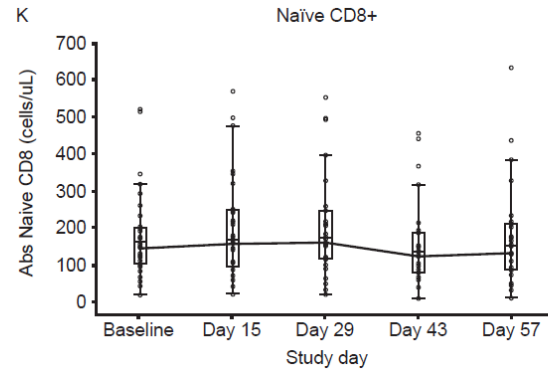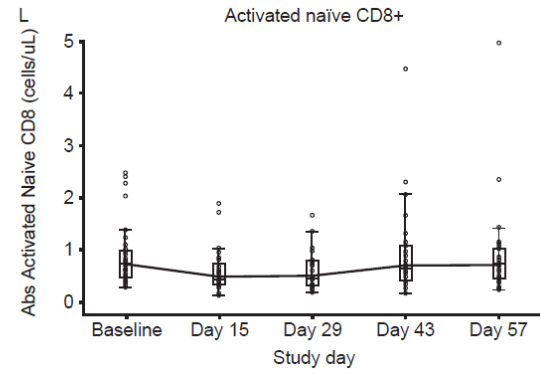

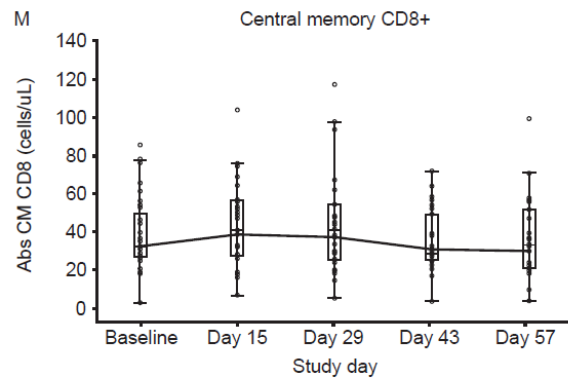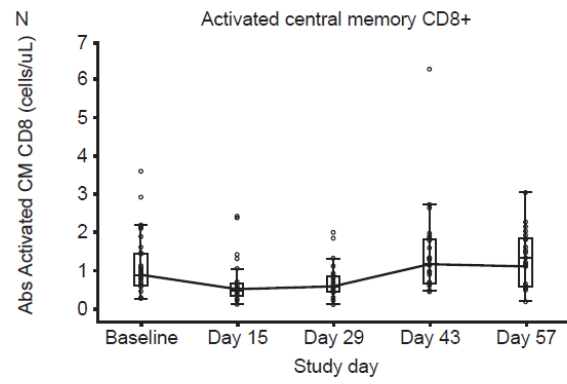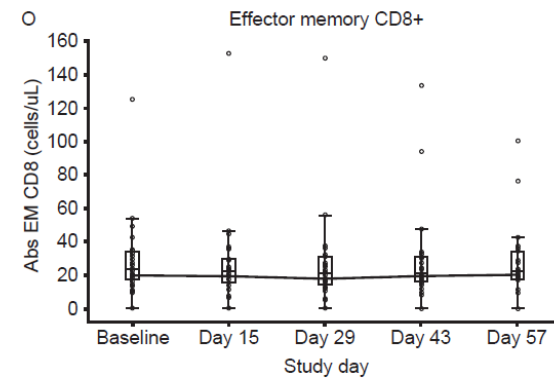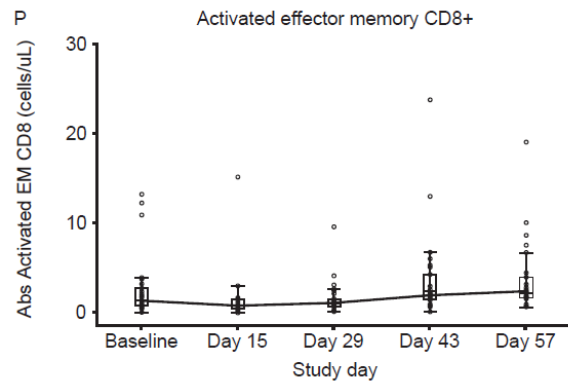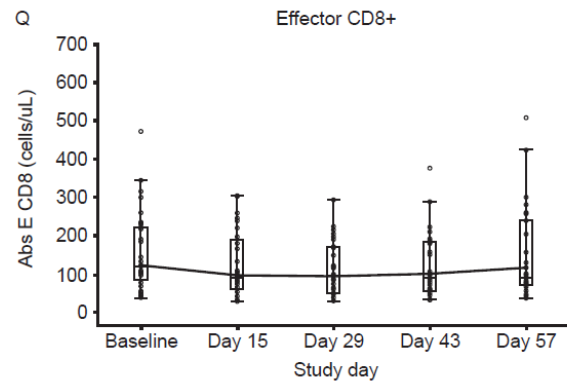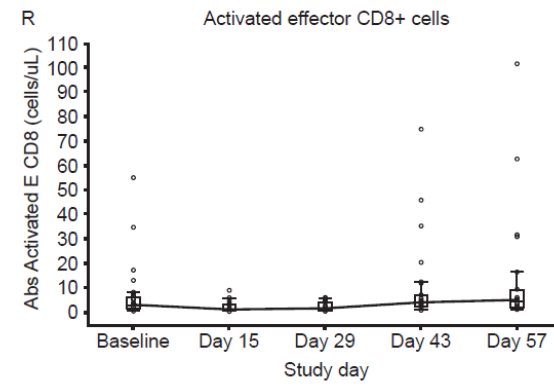

**Supplementary Fig. 3.** T-cell function during and following treatment with tofacitinib. Note that box plots provide medians and 25%/75% quartiles, with whiskers to the last point within  $1.5 \times$  interquartile range; baseline is defined as the average (mean of non-missing) of the three pre-dose measurements; the connecting lines are for geometric means; the dots represent the geometric means; and the circles represent individual values. Study Day 43 is Day 14 post-treatment; Study Day 57 is Day 28 post-treatment. CD, cluster of differentiation; CMV, cytomegalovirus; IFN- $\gamma$ , interferon-gamma; PBMCs, peripheral blood mononuclear cells; SFC, spot-forming cells.

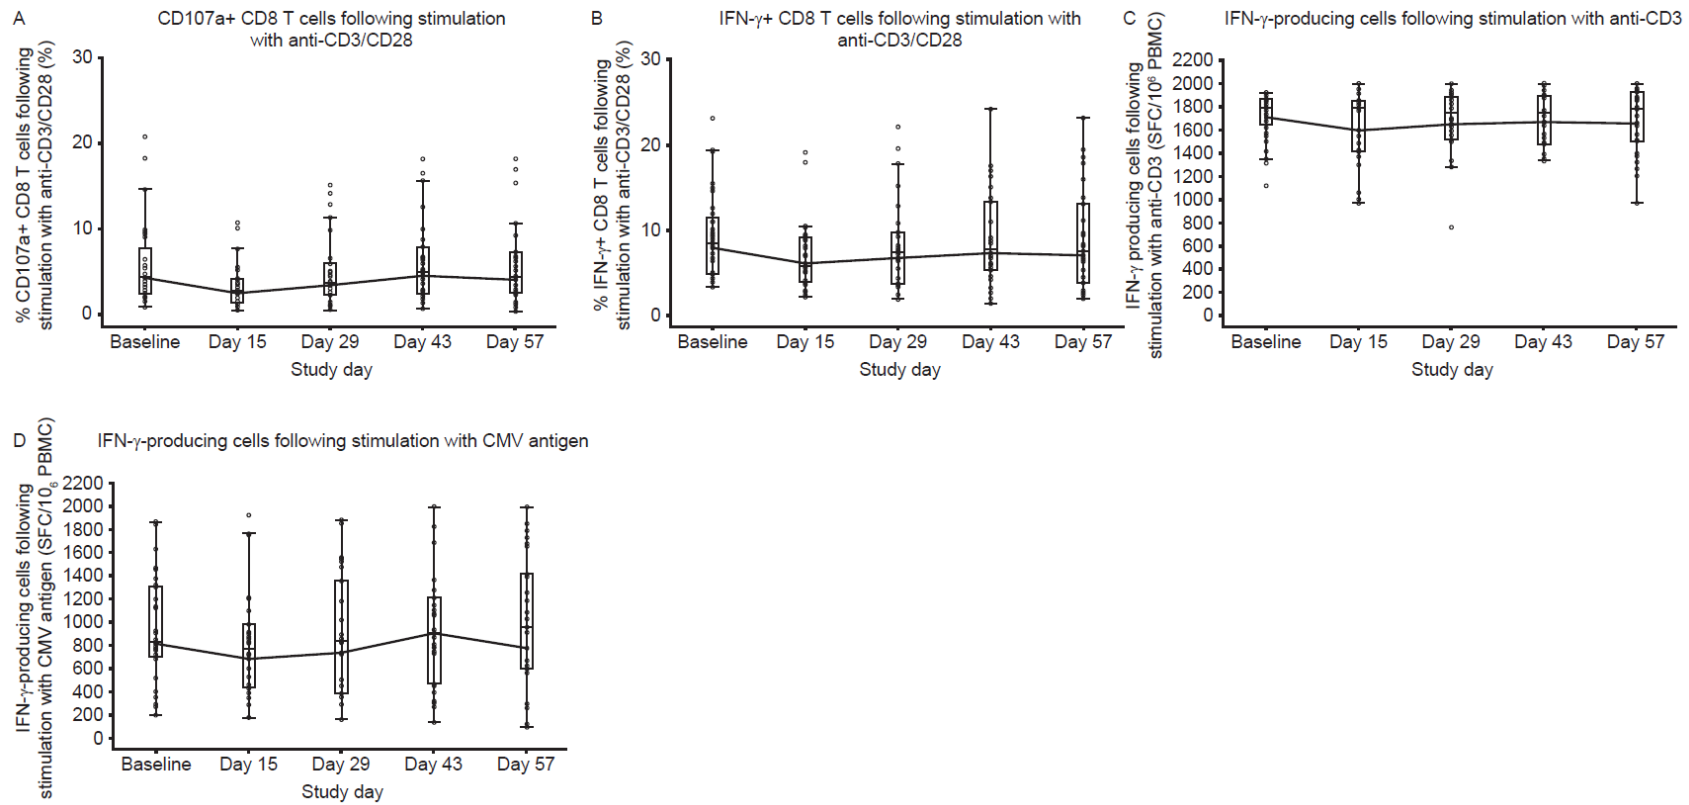



**Supplementary Fig. 4.** NK-cell counts during and following treatment with tofacitinib. Note that box plots provide medians and 25%/75% quartiles, with whiskers to the last point within  $1.5 \times$  interquartile range; baseline is defined as the average (mean of non-missing) of the three pre-dose measurements; the connecting lines are for geometric means; the dots represent the geometric means; and the circles represent individual values. Study Day 43 is Day 14 post-treatment; Study Day 57 is Day 28 post-treatment. CD, cluster of differentiation; NK, natural killer.

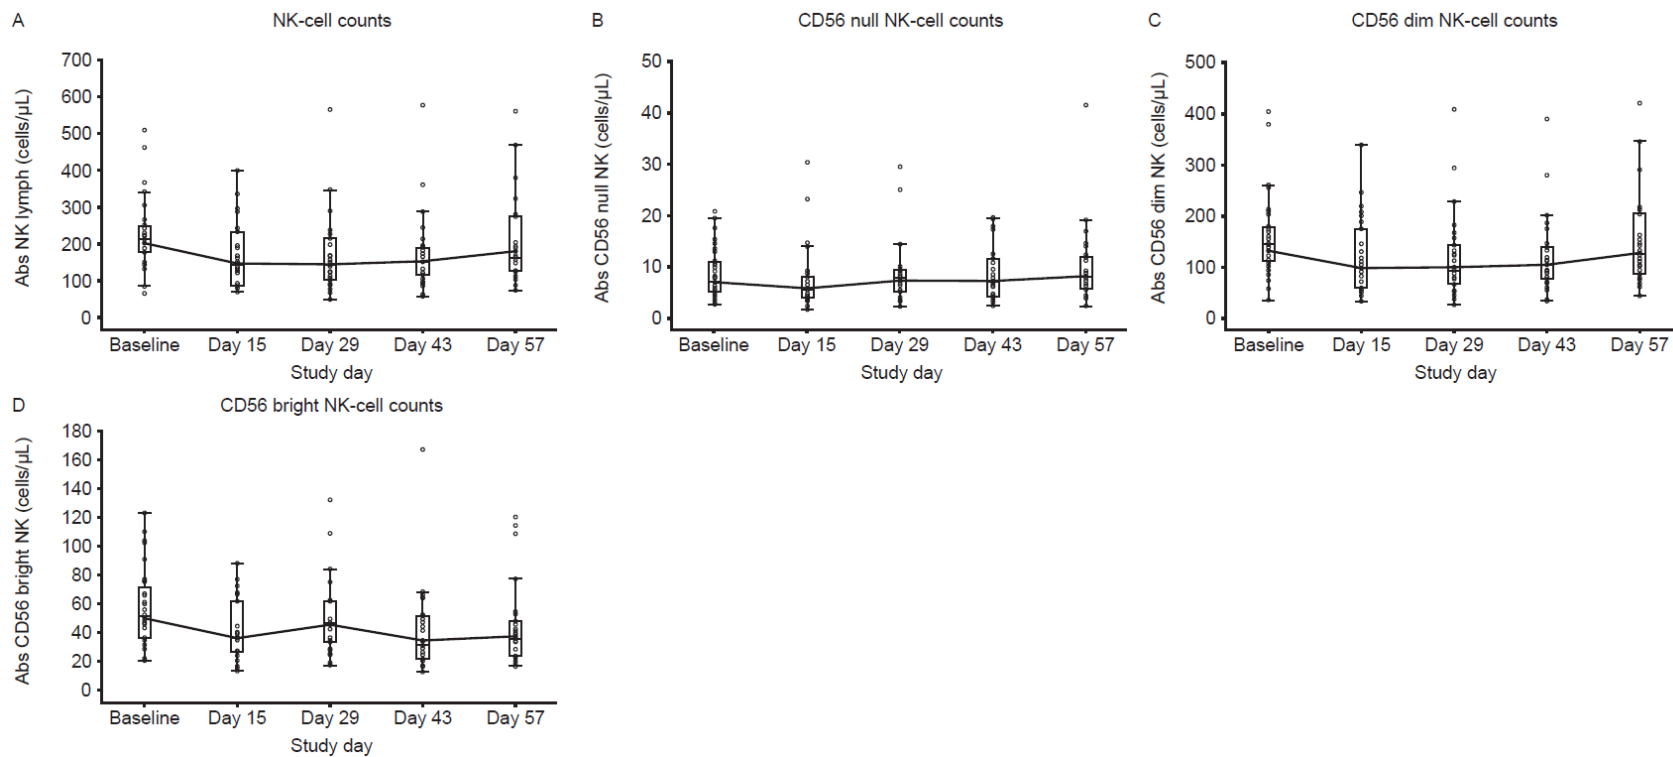

**Supplementary Fig. 5.** NK-cell function during and following treatment with tofacitinib. Note that box plots provide medians and 25%/75% quartiles, with whiskers to the last point within  $1.5 \times$  interquartile range; baseline is defined as the average (mean of non-missing) of the three pre-dose measurements; the connecting lines are for geometric means; the dots represent the geometric means; and the circles represent individual values. Study Day 43 is Day 14 post-treatment; Study Day 57 is Day 28 post-treatment. ADCC, antibody-dependent cell-mediated cytotoxicity; CD, cluster of differentiation; IFN- $\gamma$ , interferon-gamma; NK, natural killer.

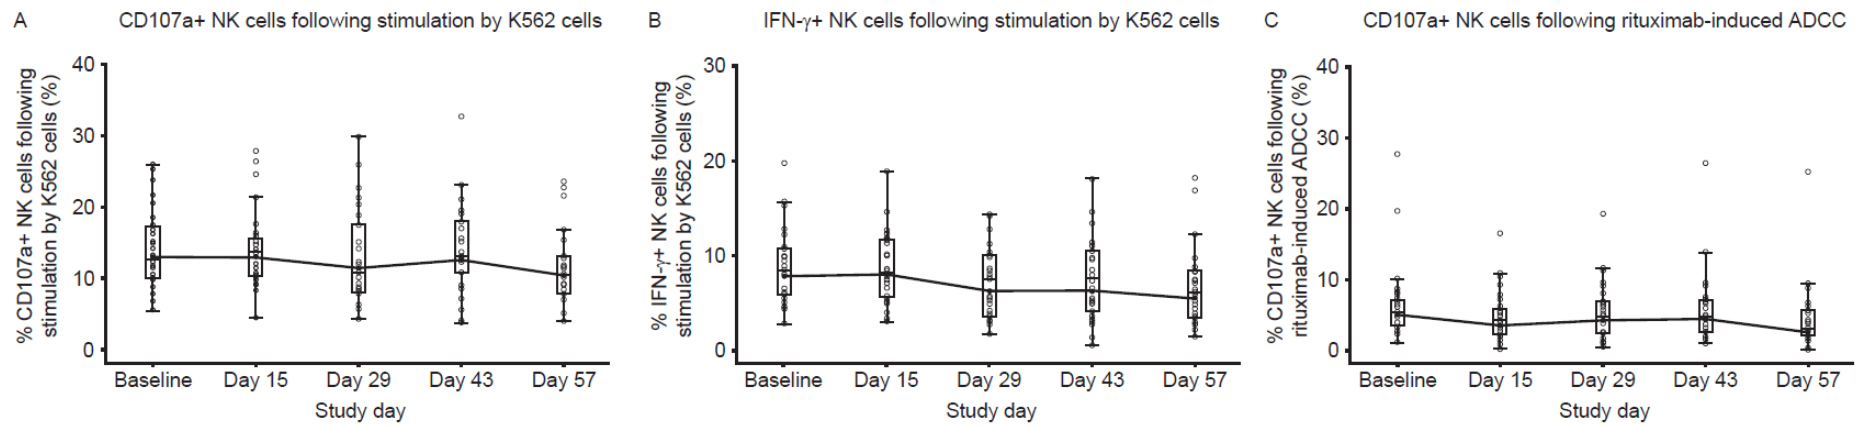

Supplement: NIHMS976947-supplement-Supplementary_Materials.pdf [file NIHMS976947-supplement-Supplementary_Materials.pdf]
